# Supplementary material for: Understanding and tackling lattice manganese exfoliation and deactivation of battery-type NiMn-LDH in fast electrochemical energy storage
Source: Royal Society of Chemistry journal article supplement (doi:10.1039/d1ta06481a), 2021-01-01
Supplement: d1ta06481a1.pdf [file d1ta06481a1.pdf]

**Understanding and Tackling Lattice Manganese Exfoliation and  
Deactivation of Battery-Type NiMn-LDH in Fast Electrochemical  
Energy Storage**

*Yanqun Tang, Zibin Liang, Yongkang Jin, Song Gao and Ruqiang Zou\**

Beijing Key Laboratory for Theory and Technology of Advanced Battery Materials,  
Institute of Clean Energy,

School of Materials Science and Engineering,

Peking University, 100871, P. R. China

E-mail: rzou@pku.edu.cn

## EXPERIMENTAL DETAILS

**Chemicals.**  $\text{NiCl}_2 \cdot 6\text{H}_2\text{O}$ ,  $\text{MnCl}_2 \cdot 4\text{H}_2\text{O}$ , methenamine,  $\text{H}_2\text{O}_2$ , and Polytetrafluoroethylene (PTFE) were purchased from Sinopharm Chemical Reagent. Activated carbon was purchased from XFNANO scientific Ltd. Ketjen Black was purchased from Shanghai Hesun Electric Co. All reagents were of analytical grade and were used without further purification. Ultrapure water was used throughout the experiments. The Ni foam was received from Kunshan Jiayisheng Dianziwang Technology Co., Ltd. The Ni foam was soaked in a solution of 2 M HCl for 10 min to remove the surface oxide layer. Subsequently, it was washed in an ultrasonic bath of acetone for 10 min to eliminate oil splashes. Finally, it was rinsed with ethanol and deionized water 3 times, respectively. The separator for ASC was purchased from Nippon Kodoshi Co., Ltd.

**Preparation of NiMn-LDH.** NiMn-LDH was synthesized by a simple one-step hydrothermal method. Briefly,  $\text{NiCl}_2 \cdot 6\text{H}_2\text{O}$  and  $\text{MnCl}_2 \cdot 4\text{H}_2\text{O}$  were dissolved in deionized water to form a 30 mL solution of 0.08 M concentration ( $\text{Ni}^{2+} : \text{Mn}^{2+} = 5 : 1$  molar ratio). 4 mmol methenamine was then added into the above solution. After stirring for 1 hour, the above solution was transferred into a 100mL Teflon-lined stainless-steel autoclave. Hydrothermal growth was conducted at 90 °C for 6 h. Finally, the resulting NiMn-LDH was thoroughly washed with water and dried at 70 °C for 12 h in a vacuum oven.

**Preparation of  $\text{NiO}_x\text{H}_y$  and  $\text{MnO}_x\text{H}_y$ .** For comparison,  $\text{NiO}_x\text{H}_y$  and  $\text{MnO}_x\text{H}_y$  were prepared by a similar procedure. Only  $\text{NiCl}_2 \cdot 6\text{H}_2\text{O}$  or  $\text{MnCl}_2 \cdot 4\text{H}_2\text{O}$  was dissolved as the metal source to form a 0.08 M solution for the deposition of their oxides or hydroxides. The deposition was carried out under the same conditions as above with no addition of another metal source.

**Preparation of LDH-O.** 500  $\mu\text{L}$  of  $\text{H}_2\text{O}_2$  (30 %) was diluted to 100 mL to prepare a solution of concentration 0.15 %. 50 mg of NiMn-LDH was added to the above solution, stirred at 700 rpm for 30 minutes. After suction filtration, the resulting LDH-O was thoroughly washed with water and dried at 70 °C for 12 h in a vacuum oven.

**Characterizations.** X-ray photoelectron spectrometry (XPS) was recorded using Al  $K\alpha$  radiation (Thermo Fisher Scientific).

Powder X-ray diffraction (XRD) patterns of all the samples were carried out using a graphite-filtered Cu  $K\alpha$  radiation operating at 40 kV and 30 mA,  $\lambda = 0.15418$  nm (SmartLab 9KW, Rigaku).

Scanning electron microscopy with an accelerating voltage of 20 kV (SEM, ZeissSUPRA) was

applied for detailed morphology analyses.

TEM and EDS mappings were taken using microscopy (Tecnai F30, FEI, US) combined with an EDX spectroscopy. For TEM observations, the samples were scraped from the Ni foam substrate and ultrasonically dispersed in ethanol and then a drop of the suspension was deposited onto a carbon-coated Cu grid followed by the evaporation of the solvent in air.

**Electrochemical measurement:** The electrochemical measurements were carried out by using a CHI760E electrochemical workstation in the case of both three-electrode configuration and two-electrode device. For the working electrode of a three-electrode system, a mixture slurry containing 70 wt% active materials, 20 wt% Ketjen Black, and 10 wt% PTFE binder was prepared then rolled with the assistance of ethanol to form a uniform film with a typical areal mass of approximately 2 ~ 3 mg cm<sup>-2</sup>. The film electrode was then pressed between two nickel foam, and dried under vacuum at 80 °C for 12 h. The working electrodes are fully activated in the electrolyte before each test. A platinum mesh electrode and a Hg/HgO electrode were used as the counter and the reference electrodes, respectively. The cyclic voltammograms (CV) were acquired in a potential range between 0 and 0.60 V at different scan rates, and the charge-discharge processes were performed between 0.1 and 0.55 V at different current densities in a 2 M KOH aqueous electrolyte. Based on the galvanostatic discharge curve, the specific capacity  $Q$  (C g<sup>-1</sup>) of the battery-type electrode material was calculated as follows:

$$Q = i_m \Delta t \quad (1)$$

where  $i_m = I/m$  (A g<sup>-1</sup>) is the current density,  $m$  is the mass of the active material,  $\Delta t$  (s) is the discharge time.

The specific capacitance  $C$  (F g<sup>-1</sup>) was calculated from the galvanostatic charge-discharge measurements using the following equation,

$$C = \frac{2i_m \int V dt}{V^2 \Big|_{V_i}^{V_f}} \quad (2)$$

$C$  represents the galvanostatic discharge specific capacitance.  $\int V dt$  is the integral current area, where  $V$  is the potential with initial and final values of  $V_i$  and  $V_f$ , respectively.  $i_m = I/m$  is the current density, where  $I$  is the current and  $m$  is the mass of active materials.

The electrochemical measurements of the two-electrode device containing LDH-O or NiMn-LDH

as the positive electrode and activated carbon as a negative electrode with separator of MPF30AC-100 (Nippon Kodoshi Corporation, Kochi, Japan) in a split test cell (Hefei Kejing Co.) configuration were carried out in a 2 M KOH electrolyte. The mass ratio of the positive electrode to the negative electrode is determined according to charge balance theory ( $q^+ = q^-$ ). Based on the CV results from the three-electrode system,

$$q = \int imdV/v \quad (3)$$

where  $q$  represents the charge,  $m$  is the mass of the active material, and  $\int idV/v$  is the integral area from CV.

In order to achieve charge balance,  $m^+ \cdot \left(\int \frac{idV}{v}\right)_+ = m^- \cdot \left(\int \frac{idV}{v}\right)_-$ , thus,

$$R = m^+ : m^- = \left(\int \frac{idV}{v}\right)_- : \left(\int \frac{idV}{v}\right)_+ \quad (4)$$

The CV was acquired in a potential range between 0 and 1.6 V at different scan rates, and the charge-discharge processes were performed by cycling the potential from 0 to 1.55 V at different current densities.

The energy density  $E$  (Wh  $\text{kg}^{-1}$ ) and power density  $P$  (kW  $\text{kg}^{-1}$ ) in the Ragone plot were calculated with the following equations,

$$E = \frac{1}{2} \cdot \frac{C \cdot \Delta V^2}{3.6} \quad (5)$$

$$P = 3.6 \cdot \frac{E}{\Delta t} \quad (6)$$

Where  $C$  is the specific gravimetric capacitance (F  $\text{g}^{-1}$ ),  $\Delta V$  is the potential window (V), and  $\Delta t$  is the discharge time (s).

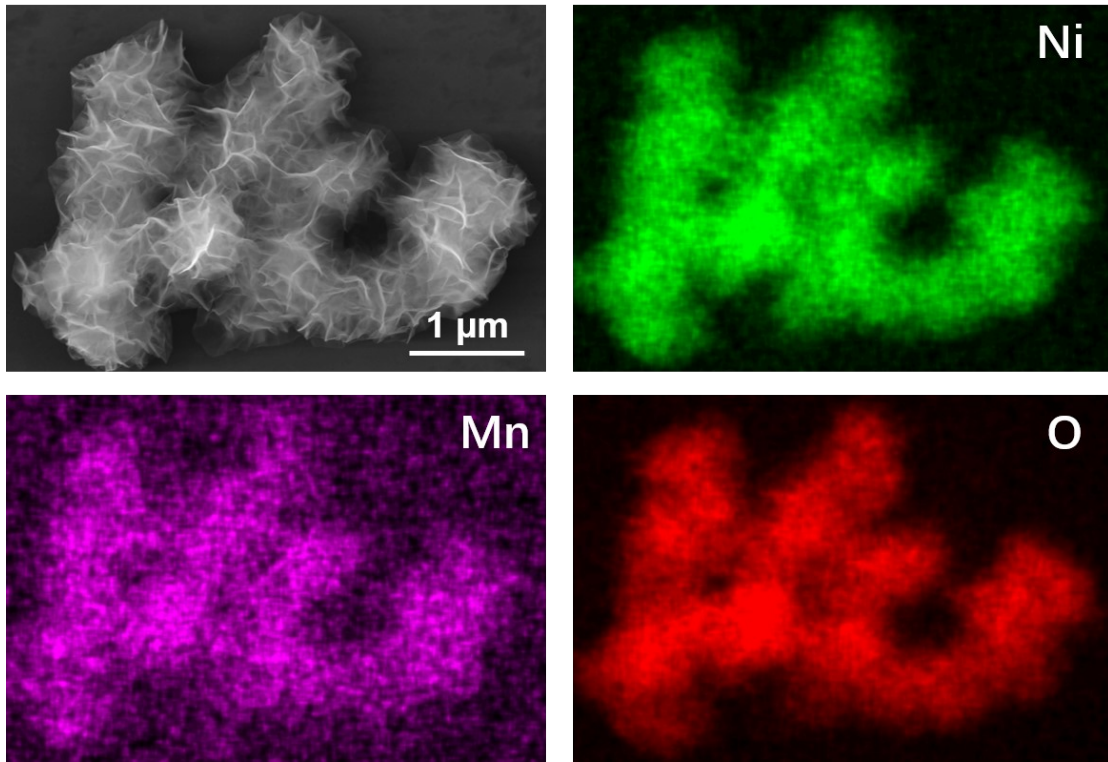

Figure S1. EDS mappings of NiMn-LDH

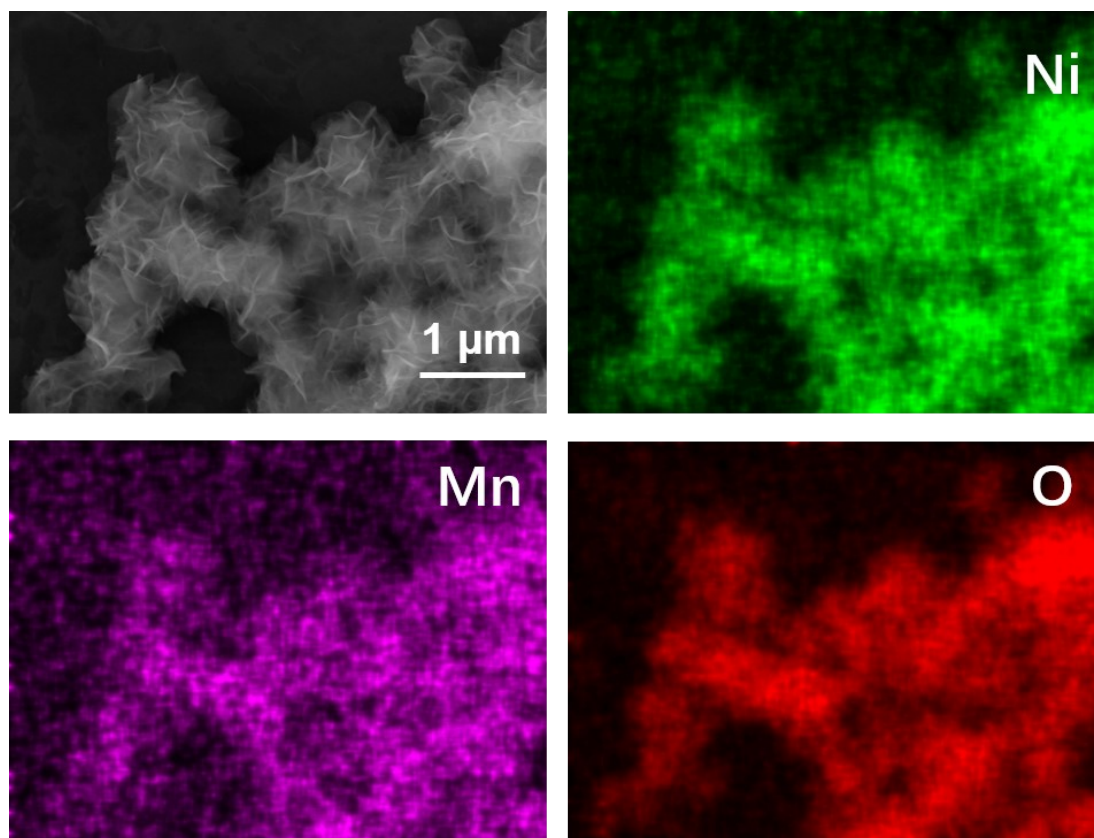

Figure S2. EDS mappings of LDH-O

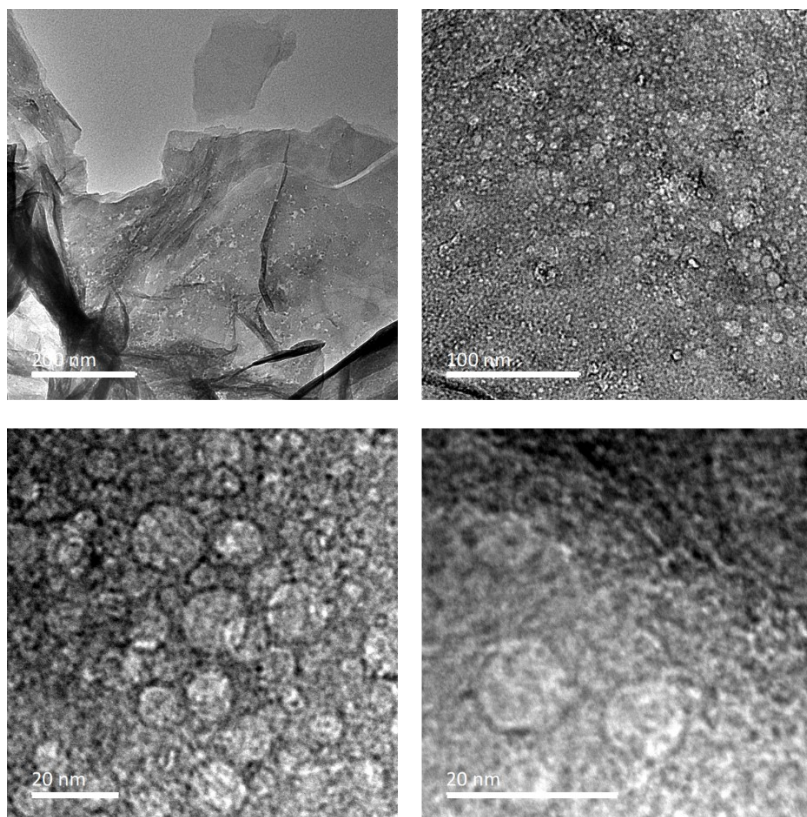

Figure S3. a,b) TEM image of LDH-O; c,d) HRTEM image of LDH-O.

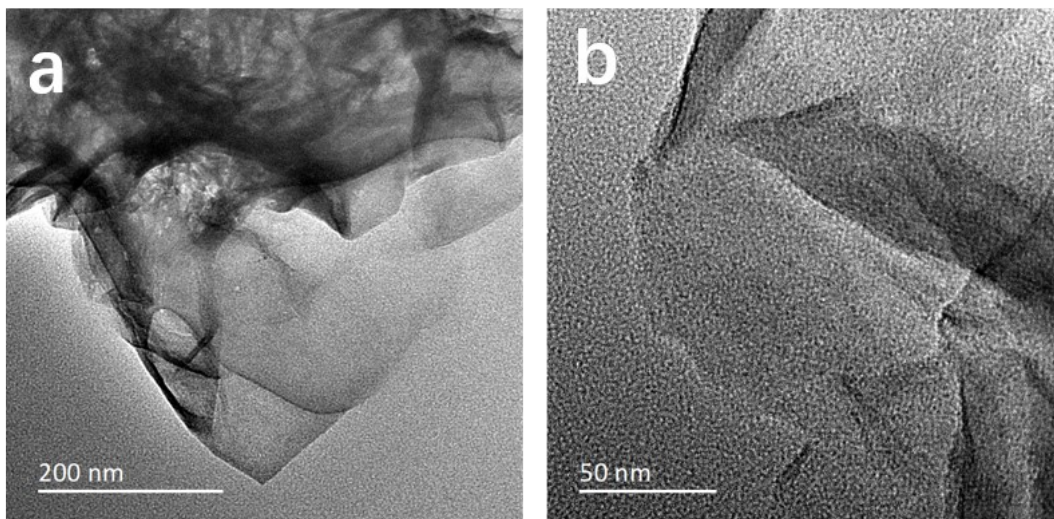

Figure S4. a) TEM image of NiMn-LDH; b) HRTEM image of NiMn-LDH.



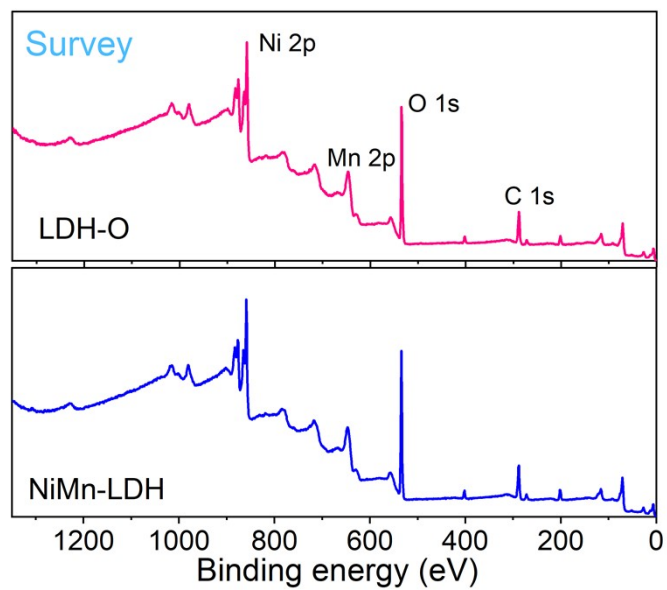

Figure S5. XPS survey spectra of NiMn-LDH and LDH-O

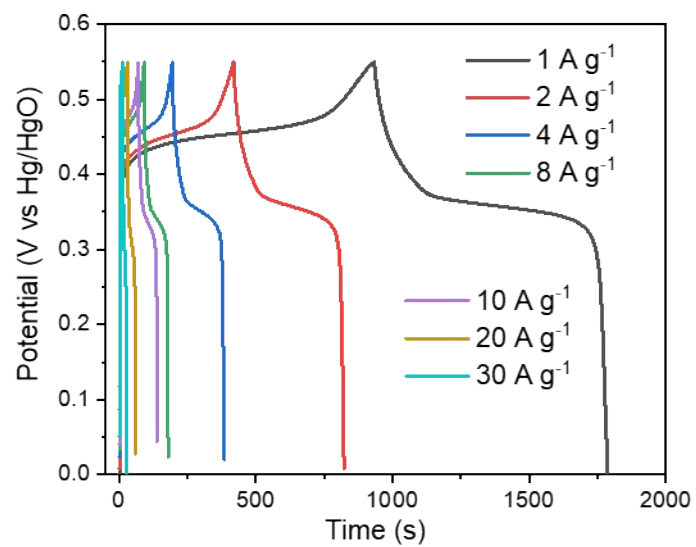

Figure S6. GCD curves of  $\text{NiO}_x\text{H}_y$  at different constant current densities.

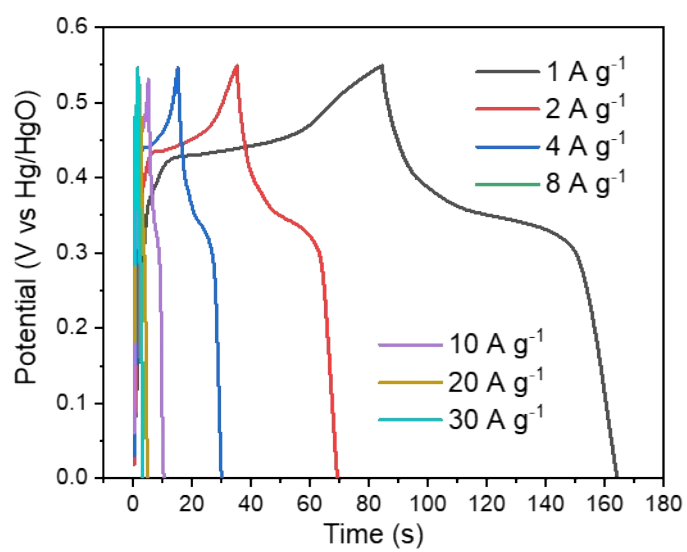

Figure S7. GCD curves of MnO<sub>x</sub>H<sub>y</sub> at different constant current densities.

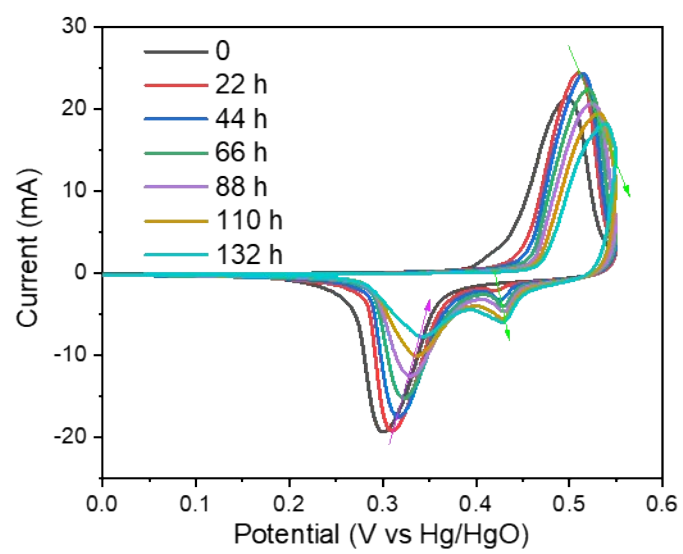

Figure S8. CV curves of the NiO<sub>x</sub>H<sub>y</sub> electrode at a scan rate of 1 mV s<sup>-1</sup> in 2 M KOH.

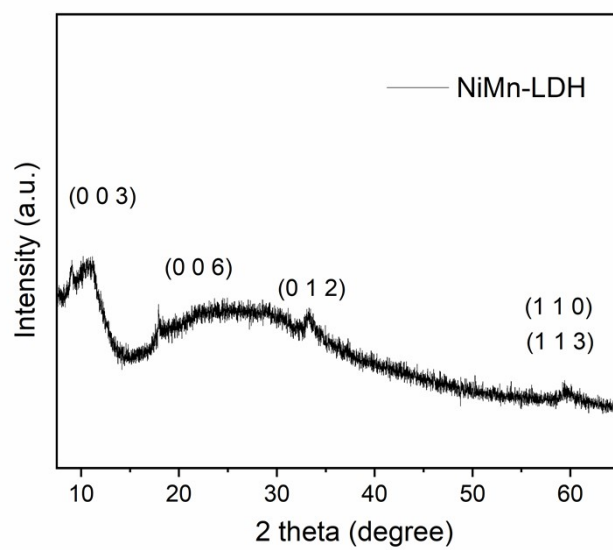

Figure S9. XRD patterns of NiMn-LDH after the phase change.

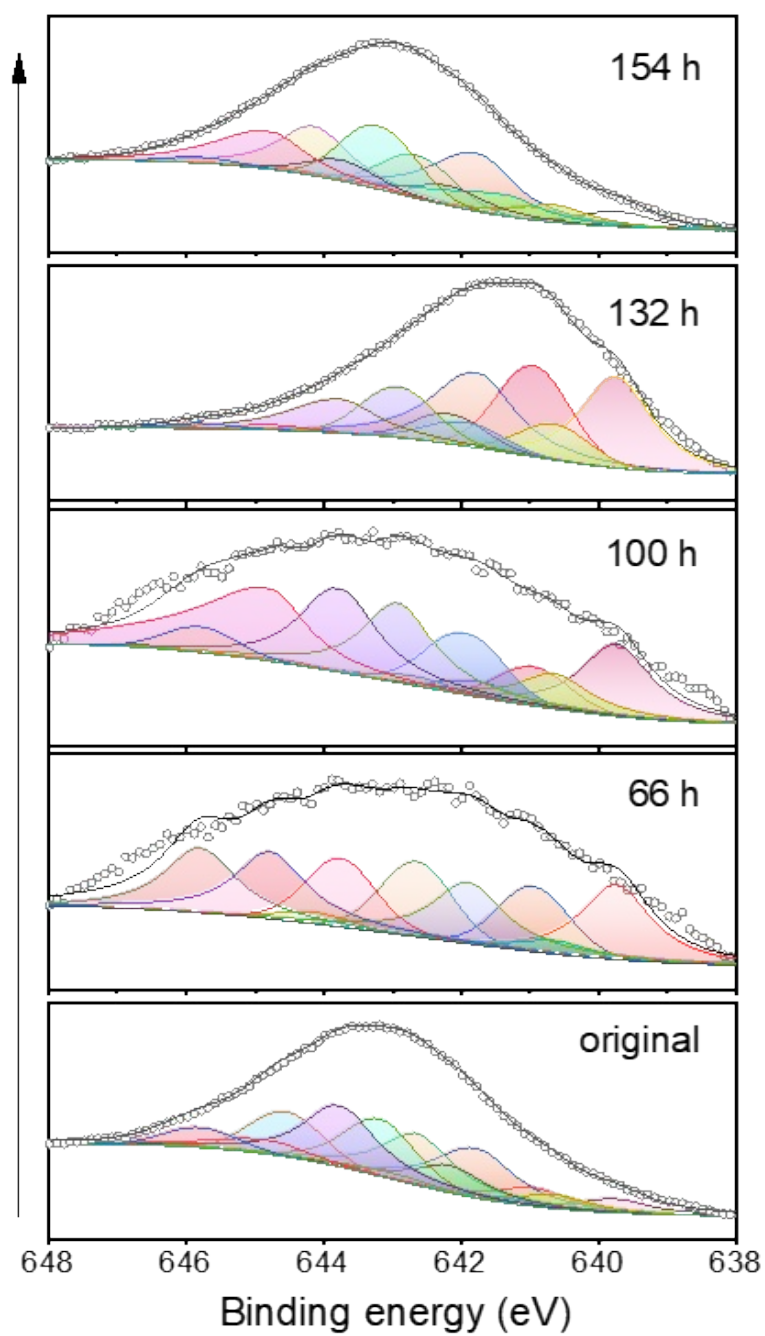

Figure S10. XPS Mn 2p<sub>3/2</sub> spectra of NiMn-LDH during the cycling.

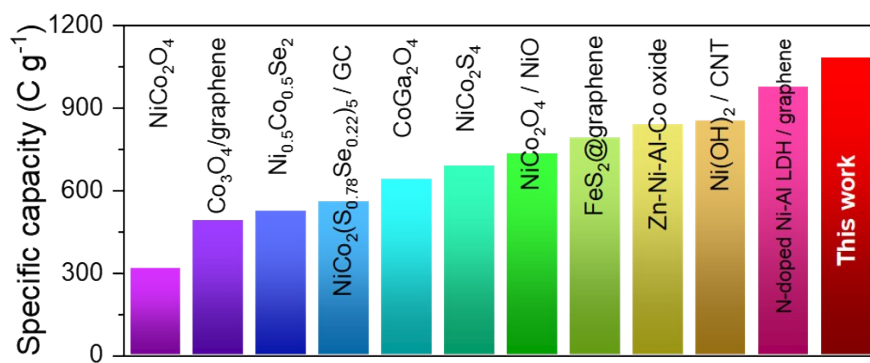

Figure S11. Comparison of specific capacity of various transition metal based materials.

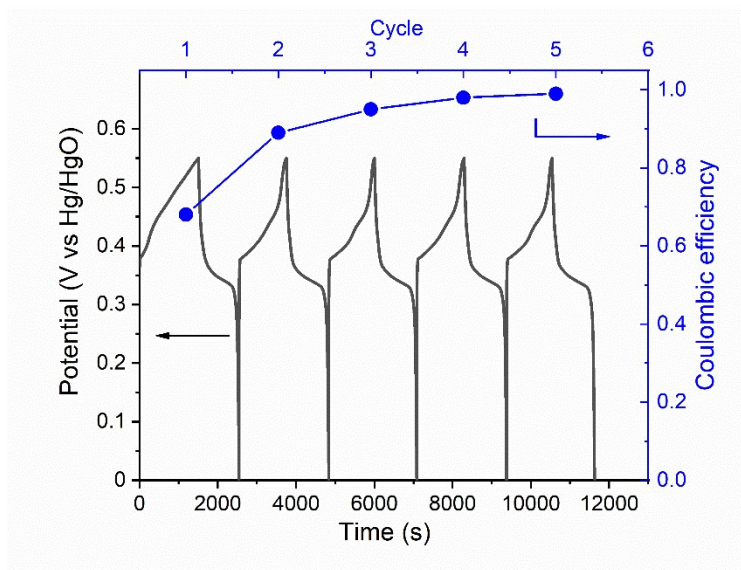

Figure S12. GCD curves and corresponding Coulombic efficiency of LDH-O for the first 5 cycles



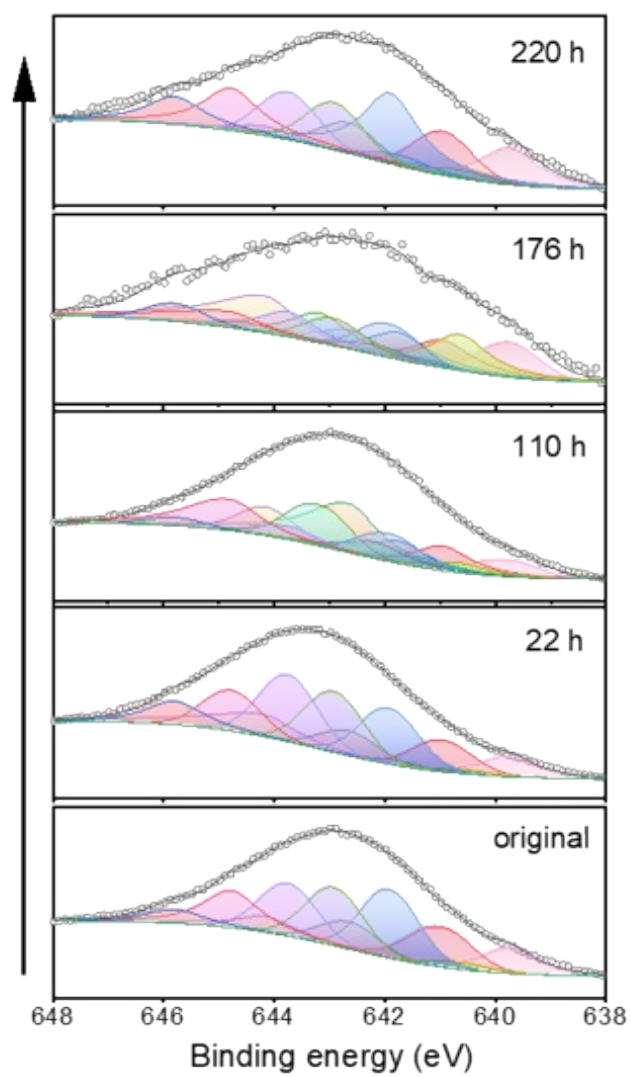

Figure S13. XPS Mn 2p<sub>3/2</sub> spectra of NiMn-LDH during the cycling.

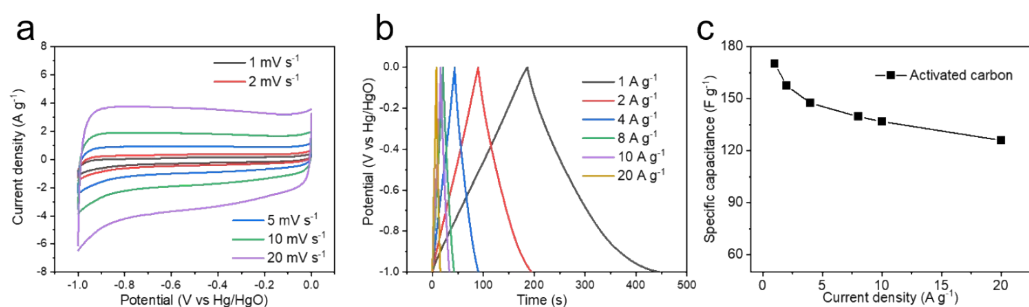

Figure S14. (a) CV curves of AC at scan rates 1, 2, 5, 10, and 20  $\text{mV s}^{-1}$ . (b) Galvanostatic charge/discharge curves of AC at different constant current densities. (c) Specific capacity of AC as a function of the current densities calculated from the corresponding discharge curve for each current density.

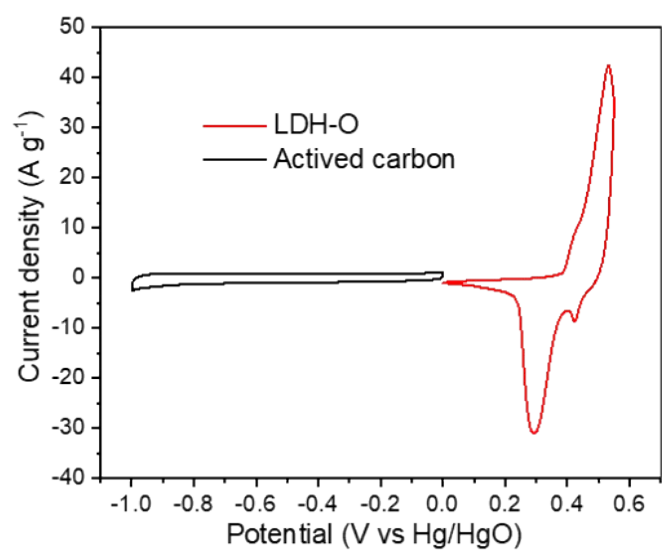

Figure S15. CV curves comparison between LDH-O positive electrode active material and activated carbon negative electrode material at  $5 \text{ mV s}^{-1}$ .

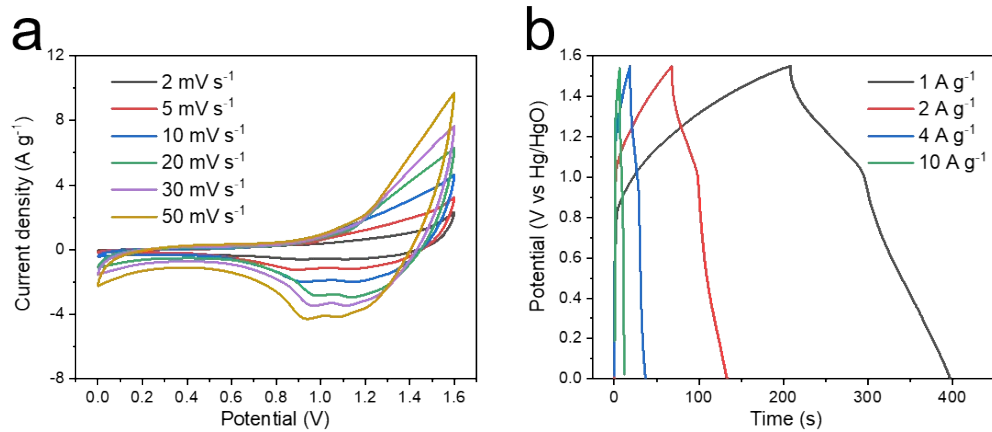

Figure S16. (a) CV curves of NiMn-LDH//AC at scan rates 2, 5, 10, 20, 30, and 50 mV s<sup>-1</sup>. (b) Galvanostatic charge/discharge curves of NiMn-LDH//AC at different constant current densities.

Table S1. O1s peak parameters for NiMn-LDH and LDH-O.

|                     | O 1s                  |                       |                        | OH <sup>-</sup> ratio | OH <sup>-</sup> /O <sup>2-</sup> |
|---------------------|-----------------------|-----------------------|------------------------|-----------------------|----------------------------------|
| Binding energy (eV) | 530.8 O <sup>2-</sup> | 531.6 OH <sup>-</sup> | 532.9 H <sub>2</sub> O |                       |                                  |
| NiMn-LDH            | 102386.59             | 266569.16             | 18449.5                | 68.8 %                | 2.6                              |
| LDH-O               | 44575.92              | 98461.52              | 8652.62                | 64.9 %                | 2.2                              |

Table S2. Mn 2p<sub>3/2</sub> peak parameters for NiMn-LDH and Ov-LDH.

|                     | Mn <sup>2+</sup> (2p <sub>3/2</sub> ) |          |          |          |          | Sum     |
|---------------------|---------------------------------------|----------|----------|----------|----------|---------|
| Binding energy (eV) | 639.75                                | 640.95   | 641.75   | 642.65   | 644.15   |         |
| NiMn-LDH            | 10379.69                              | 14824.73 | 34705.29 | 33834.56 | 0        | 37.08 % |
| LDH-O               | 17455.41                              | 26546.7  | 0        | 16512.44 | 12533.28 | 33.19 % |
|                     | Mn <sup>3+</sup> (2p <sub>3/2</sub> ) |          |          |          |          | Sum     |
| Binding energy (eV) | 640.65                                | 641.35   | 642.16   | 643.18   | 644.55   |         |
| NiMn-LDH            | 9082.68                               | 3617.02  | 18056.43 | 36349.84 | 23071.27 | 35.67 % |
| LDH-O               | 4312.75                               | 585.18   | 0        | 303.25   | 0        | 2.36 %  |
|                     | Mn <sup>4+</sup> (2p <sub>3/2</sub> ) |          |          |          |          | Sum     |
| Binding energy (eV) | 641.9                                 | 642.92   | 643.75   | 644.78   | 645.8    |         |
| NiMn-LDH            | 556.89                                | 5928.46  | 40448.86 | 11635.51 | 10333.00 | 27.25 % |
| LDH-O               | 40574.27                              | 34441.35 | 31013.64 | 26492.27 | 9289.25  | 64.44 % |

Table S3. Mn 2p<sub>3/2</sub> peak parameters for NiMn-LDH (66 h) and Ov-LDH (22 h) at the end of Stage I.

|                     |  | Mn <sup>2+</sup> (2p <sub>3/2</sub> ) |          |          |          |          | Sum     |
|---------------------|--|---------------------------------------|----------|----------|----------|----------|---------|
| Binding energy (eV) |  | 639.75                                | 640.95   | 641.75   | 642.65   | 644.15   |         |
| NiMn-LDH            |  | 10616.1                               | 7612.95  | 14944.73 | 4810.29  | 1380.48  | 49.96 % |
| LDH-O               |  | 15119.14                              | 20095.82 | 4082.86  | 15741.9  | 25601.27 | 33.38 % |
|                     |  | Mn <sup>3+</sup> (2p <sub>3/2</sub> ) |          |          |          |          | Sum     |
| Binding energy (eV) |  | 640.65                                | 641.35   | 642.16   | 643.18   | 644.55   |         |
| NiMn-LDH            |  | 2232.82                               | 0        | 338.1    | 0        | 0        | 3.07 %  |
| LDH-O               |  | 2501.72                               | 26.00    | 0        | 51.52    | 148.48   | 1.13 %  |
|                     |  | Mn <sup>4+</sup> (2p <sub>3/2</sub> ) |          |          |          |          | Sum     |
| Binding energy (eV) |  | 641.9                                 | 642.92   | 643.75   | 644.78   | 645.8    |         |
| NiMn-LDH            |  | 9925.33                               | 3677.07  | 8036.24  | 10693.02 | 9565.15  | 49.98 % |
| LDH-O               |  | 35534.42                              | 38429.54 | 42036.36 | 25370.99 | 16839.85 | 65.49 % |

Table S4. Mn 2p<sub>3/2</sub> peak parameters for NiMn-LDH (100 h) and Ov-LDH (110 h) at the middle of Stage II.

|                     |  | Mn <sup>2+</sup> (2p <sub>3/2</sub> ) |          |          |          |          | Sum     |
|---------------------|--|---------------------------------------|----------|----------|----------|----------|---------|
| Binding energy (eV) |  | 639.75                                | 640.95   | 641.75   | 642.65   | 644.15   |         |
| NiMn-LDH            |  | 11129.17                              | 4836.15  | 1978.99  | 1667.74  | 0        | 23.25 % |
| LDH-O               |  | 12861.72                              | 13167.49 | 3297.44  | 9018.8   | 2710.3   | 31.41 % |
|                     |  | Mn <sup>3+</sup> (2p <sub>3/2</sub> ) |          |          |          |          | Sum     |
| Binding energy (eV) |  | 640.65                                | 641.35   | 642.16   | 643.18   | 644.55   |         |
| NiMn-LDH            |  | 5906.4                                | 759.14   | 601.6    | 0        | 561.25   | 9.28 %  |
| LDH-O               |  | 2514.64                               | 2342.25  | 942.77   | 0        | 0        | 4.44 %  |
|                     |  | Mn <sup>4+</sup> (2p <sub>3/2</sub> ) |          |          |          |          | Sum     |
| Binding energy (eV) |  | 641.9                                 | 642.92   | 643.75   | 644.78   | 645.8    |         |
| NiMn-LDH            |  | 8367.22                               | 13185.61 | 14212.12 | 17906.71 | 3245.39  | 67.47 % |
| LDH-O               |  | 28384.14                              | 13933.24 | 14074.55 | 17062.14 | 10402.51 | 64.15 % |

Table S5. Mn 2p<sub>3/2</sub> peak parameters for NiMn-LDH (132 h) and Ov-LDH (176 h) at the middle of Stage III.

|                     |  | Mn <sup>2+</sup> (2p <sub>3/2</sub> ) |          |          |         |         | Sum     |
|---------------------|--|---------------------------------------|----------|----------|---------|---------|---------|
| Binding energy (eV) |  | 639.75                                | 640.95   | 641.75   | 642.65  | 644.15  |         |
| NiMn-LDH            |  | 43537.75                              | 38628.01 | 44805.09 | 0       | 1248.71 | 59.07 % |
| LDH-O               |  | 3943.03                               | 4185.5   | 4106.99  | 2896.79 | 7771.93 | 43.86 % |
|                     |  | Mn <sup>3+</sup> (2p <sub>3/2</sub> ) |          |          |         |         | Sum     |
| Binding energy (eV) |  | 640.65                                | 641.35   | 642.16   | 643.18  | 644.55  |         |
| NiMn-LDH            |  | 15074.7                               | 0        | 12671.31 | 573.76  | 1084.03 | 13.55 % |
| LDH-O               |  | 5427.38                               | 822.64   | 1117.99  | 4500.56 | 1172.29 | 24.97 % |
|                     |  | Mn <sup>4+</sup> (2p <sub>3/2</sub> ) |          |          |         |         | Sum     |
| Binding energy (eV) |  | 641.9                                 | 642.92   | 643.75   | 644.78  | 645.8   |         |
| NiMn-LDH            |  | 10866.01                              | 21705.99 | 21777.7  | 2472.45 | 2631.85 | 27.39 % |
| LDH-O               |  | 3933.19                               | 3102.11  | 3728.2   | 3479.29 | 2033.81 | 31.17 % |



Table S6. Mn 2p<sub>3/2</sub> peak parameters for NiMn-LDH (154 h) and Ov-LDH (220 h) at the end of Stage III.

|                     |  | Mn <sup>2+</sup> (2p <sub>3/2</sub> ) |          |          |          |          | Sum     |
|---------------------|--|---------------------------------------|----------|----------|----------|----------|---------|
| Binding energy (eV) |  | 639.75                                | 640.95   | 641.75   | 642.65   | 644.15   |         |
| NiMn-LDH            |  | 7913.05                               | 8403.65  | 42252.15 | 22126.33 | 31160.46 | 47.33 % |
| LDH-O               |  | 11842.61                              | 18340.15 | 17064.56 | 45911.51 | 17519.39 | 48.78 % |
|                     |  | Mn <sup>3+</sup> (2p <sub>3/2</sub> ) |          |          |          |          | Sum     |
| Binding energy (eV) |  | 640.65                                | 641.35   | 642.16   | 643.18   | 644.55   |         |
| NiMn-LDH            |  | 11348.73                              | 21313.35 | 13063.16 | 33340.85 | 2773.26  | 34.63 % |
| LDH-O               |  | 7394.05                               | 7625.93  | 12779.08 | 26780.24 | 0        | 24.06 % |
|                     |  | Mn <sup>4+</sup> (2p <sub>3/2</sub> ) |          |          |          |          | Sum     |
| Binding energy (eV) |  | 641.9                                 | 642.92   | 643.75   | 644.78   | 645.8    |         |
| NiMn-LDH            |  | 0                                     | 0        | 10955.39 | 28474.45 | 3214.79  | 18.04 % |
| LDH-O               |  | 17541.82                              | 2345.29  | 8750.93  | 27937.61 | 5058.6   | 27.16 % |

Table S7. Comparison of electrochemistry performance of various transition metal based materials.

| Materials                                                        | Current density     | Specific capacity | Cycles | CR     | Electrolyte |
|------------------------------------------------------------------|---------------------|-------------------|--------|--------|-------------|
| NiCo <sub>2</sub> O <sub>4</sub>                                 | 1 A g <sup>-1</sup> | 315               | 50000  | 91.6 % | 2 M KOH     |
| Ni <sub>0.5</sub> Co <sub>0.5</sub> Se <sub>2</sub>              | 1 A g <sup>-1</sup> | 524               | 3500   | 91 %   | 6 M KOH     |
| NiCo <sub>2</sub> (S <sub>0.78</sub> Se <sub>0.22</sub> )<br>/GC | 1 A g <sup>-1</sup> | 561               | 2000   | 93.7 % | 3 M KOH     |
| CoGa <sub>2</sub> O <sub>4</sub>                                 | 1 A g <sup>-1</sup> | 642               | 20000  | 123 %  | 3 M KOH     |
| NiCo <sub>2</sub> S <sub>4</sub>                                 | 1 A g <sup>-1</sup> | 689               | 10000  | 98.8 % | 6 M KOH     |
| NiCo <sub>2</sub> O <sub>4</sub> /NiO                            | 1 A g <sup>-1</sup> | 732               | 3000   | 92.5 % | 6 M KOH     |
| FeS <sub>2</sub> @graphene                                       | 3 A g <sup>-1</sup> | 793               | 5000   | 88 %   | 2 M KOH     |
| Zn-Ni-Al-Co<br>oxide                                             | 1 A g <sup>-1</sup> | 839               | 10000  | 90%    | 2 M KOH     |
| Ni(OH) <sub>2</sub> /CNT                                         | 2 A g <sup>-1</sup> | 854               | 5000   | 84 %   | PVA-KOH     |
| N-doped Ni-Al<br>LDH / graphene                                  | 1 A g <sup>-1</sup> | 975               | 2000   | 80 %   | 6 M KOH     |
| This work                                                        | 1 A g <sup>-1</sup> | 1082              | 3000   | 85 %   | 2 M KOH     |
